# Supplementary material
Source: publisher figshare collection journal article supplement (https://tandf.figshare.com/ndownloader/files/15013826)

## Analgesic efficacy of articaine hydrochloride for velvet antler removal in red deer (*Cervus elaphus*) and analysis of drug residues in the harvested velvet antlers

D Venkatachalam<sup>\*§</sup>, JP Chambers<sup>\*</sup>, K Kongara<sup>\*</sup> and P Singh<sup>\*</sup>

<sup>\*</sup> School of Veterinary Science, Massey University, Private Bag 11222, Palmerston North 4442, New Zealand

<sup>§</sup> Author for correspondence. Email: D.Venkatachalam @massey.ac.nz

**Supplementary Figure 1. Representative chromatograms and the mass spectra of (a) drug-free antler, drug-free antler spiked with (b) lignocaine (5 ng/g), (c) articaine (50 ng/g), (d) articainic acid (100 ng/g), (e) monoethylglycinexylidide (MEGX) (100 ng/g), (f) 2,6-dimethylaniline (DMA) (100 ng/g), and antler samples obtained following ring block of (g) 4 % articaine hydrochloride and (h) 2% lignocaine hydrochloride in red deer (*Cervus elaphus*).**

**a**

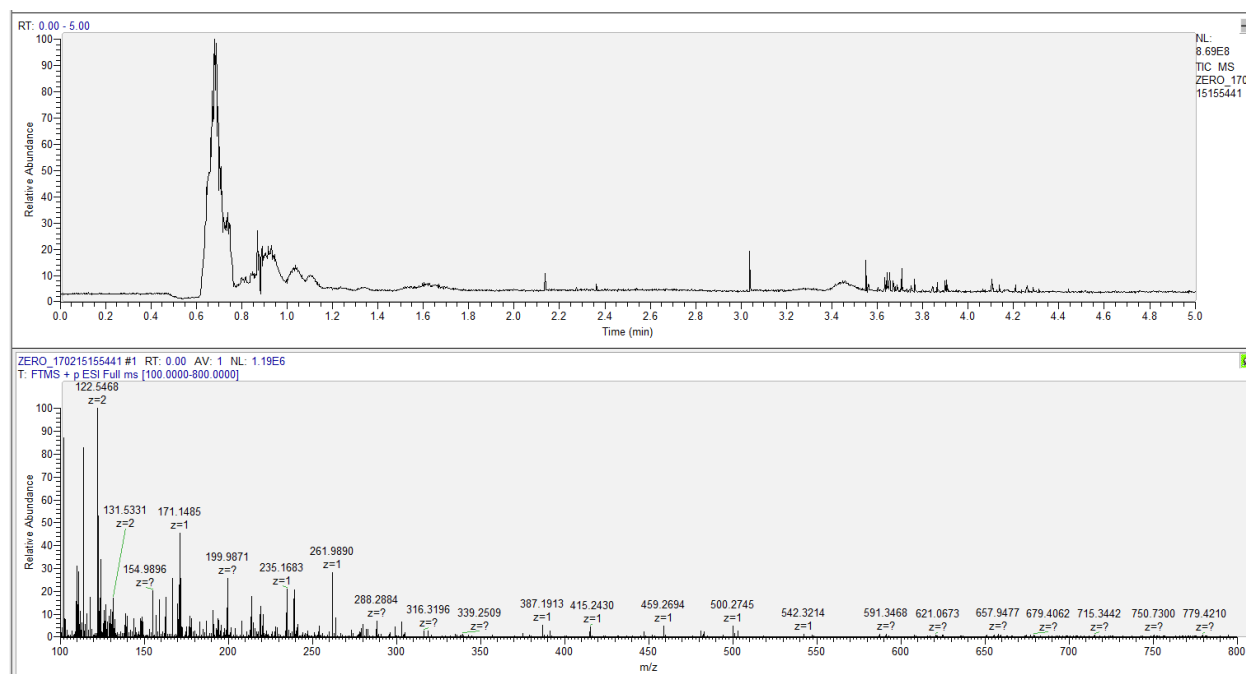

**b**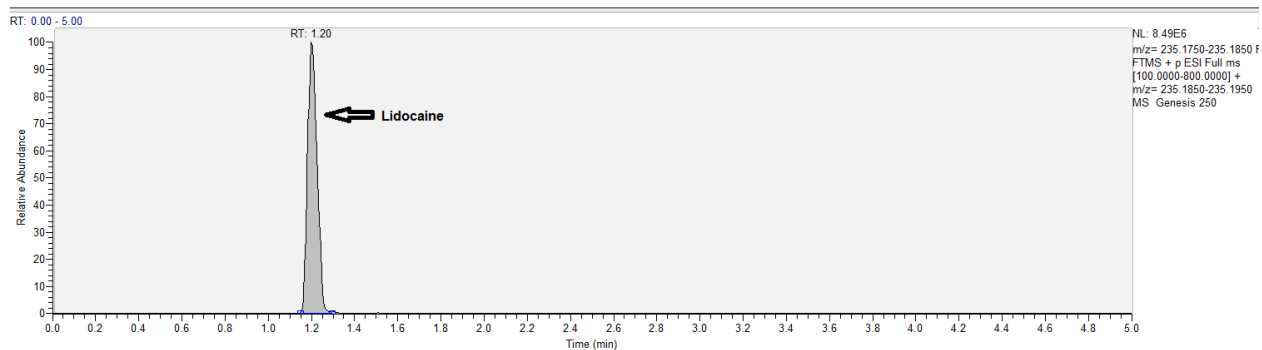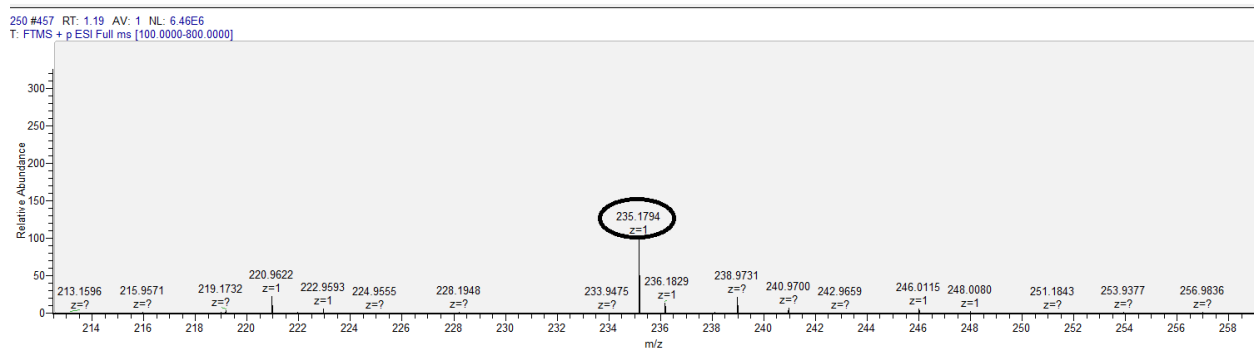**c**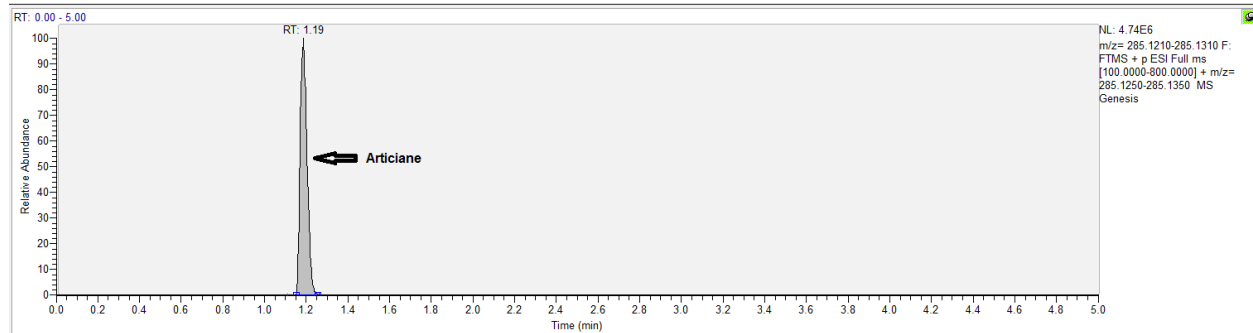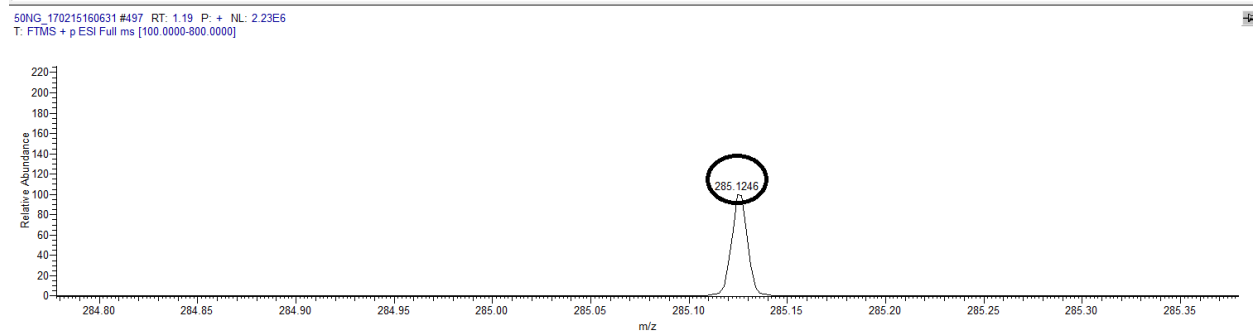

**d**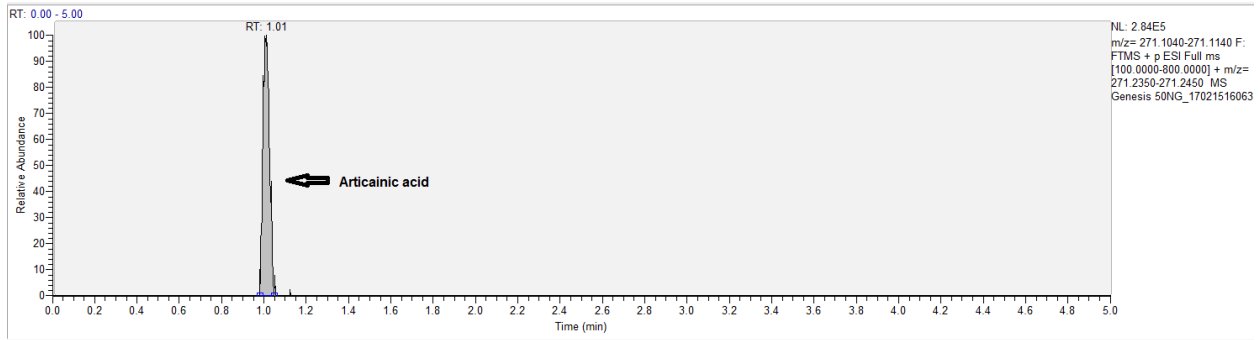

50NG\_170215160631 #423 RT: 1.01 P: + NL: 2.71E5  
T: FTMS + p ESI Full ms [100.0000-800.0000]

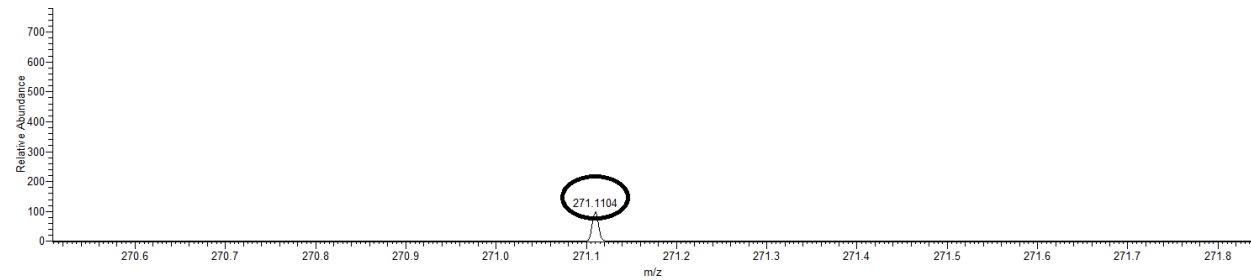**e**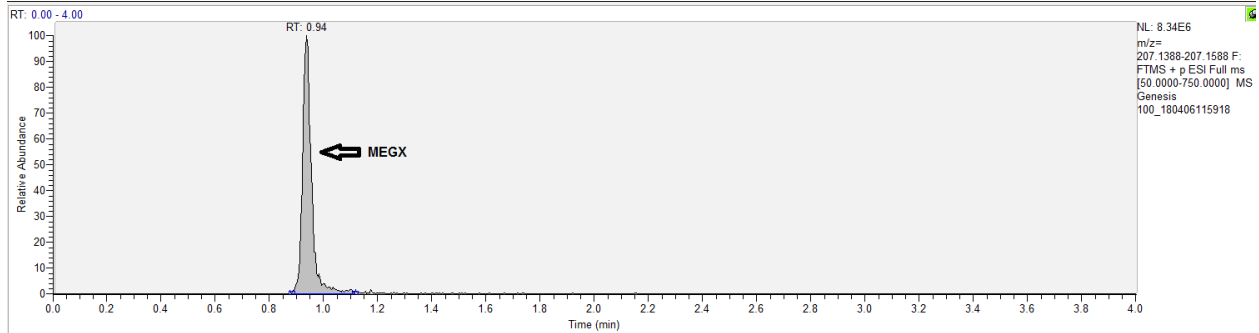

100\_180406115918 #357 RT: 0.94 AV: 1 NL: 7.93E6  
T: FTMS + p ESI Full ms [50.0000-750.0000]

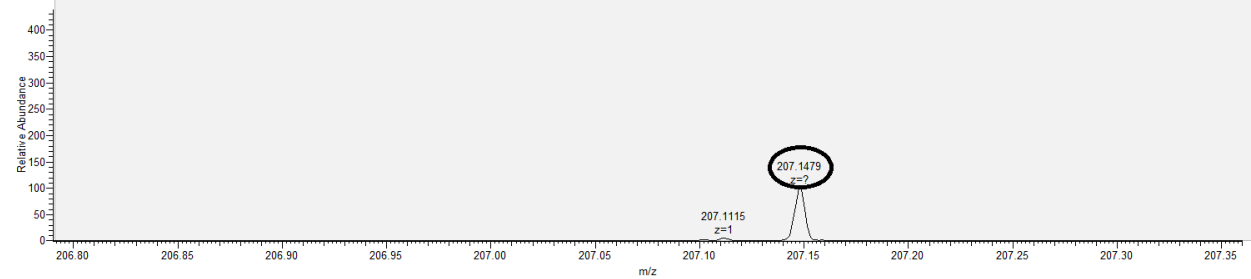

f

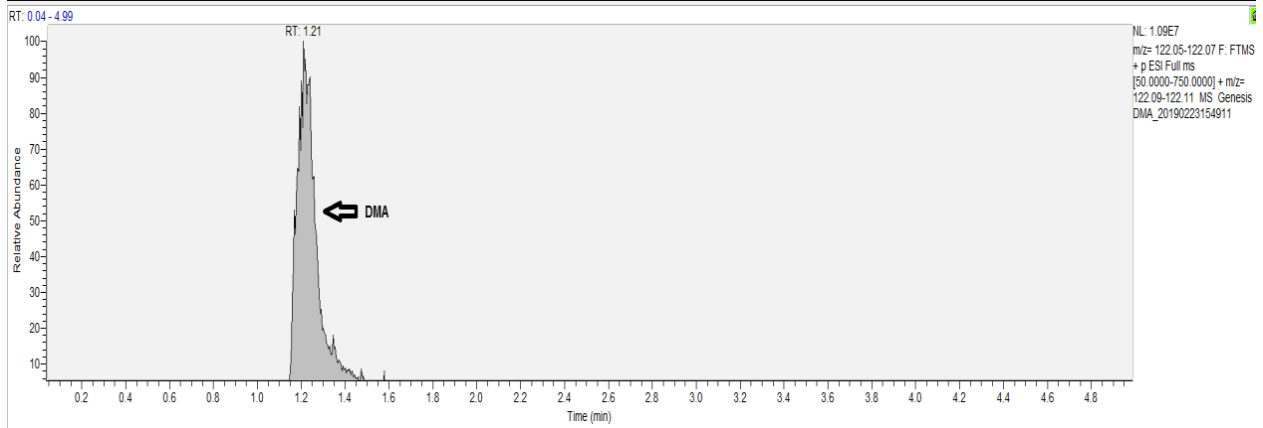

DMA\_20190223154911 #475 RT: 1.23 AV: 1 NL: 9.22E6  
T: FTMS + p ESI Full ms [50.0000-750.0000]

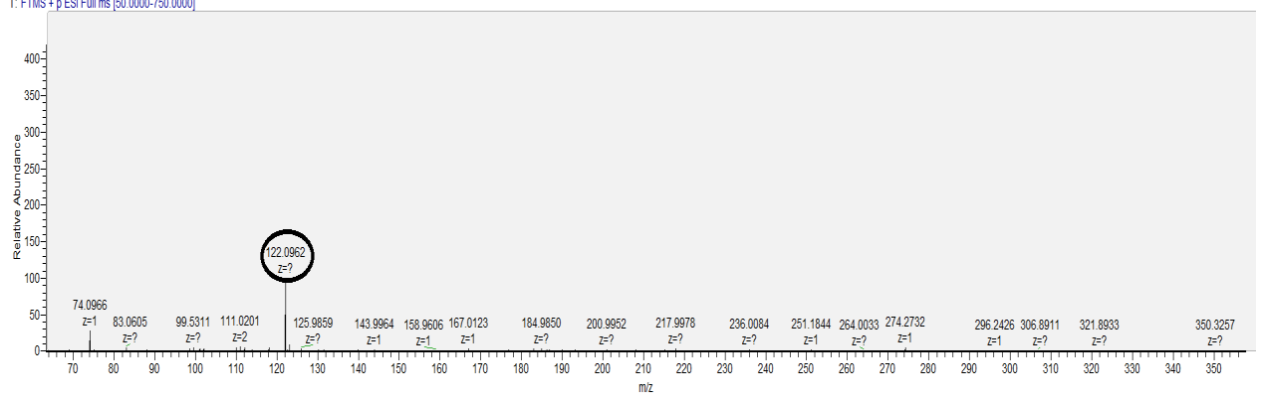

g

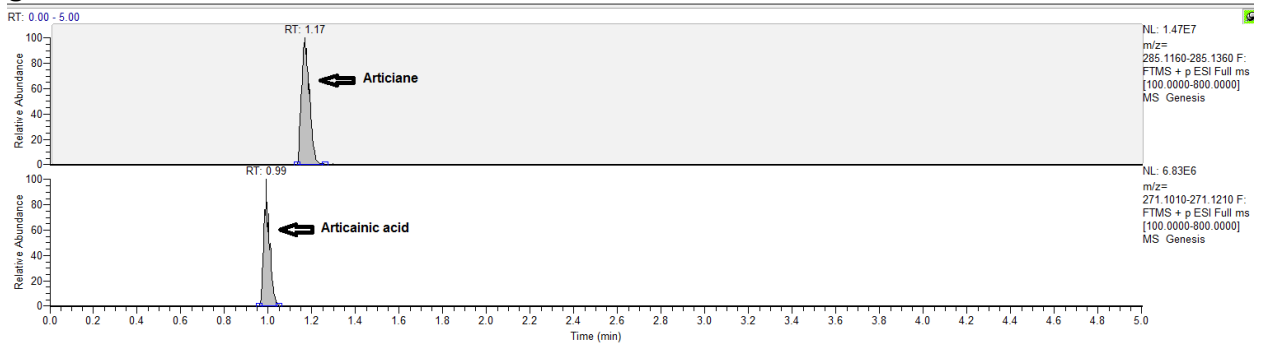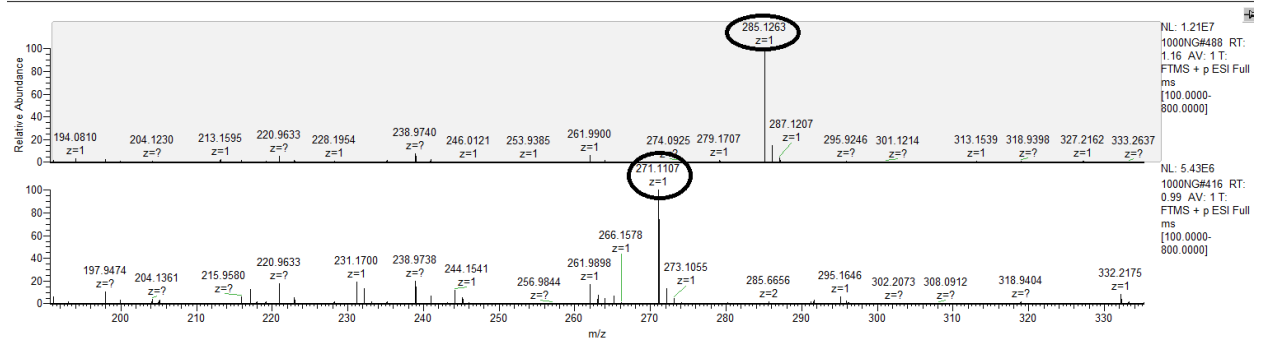

h

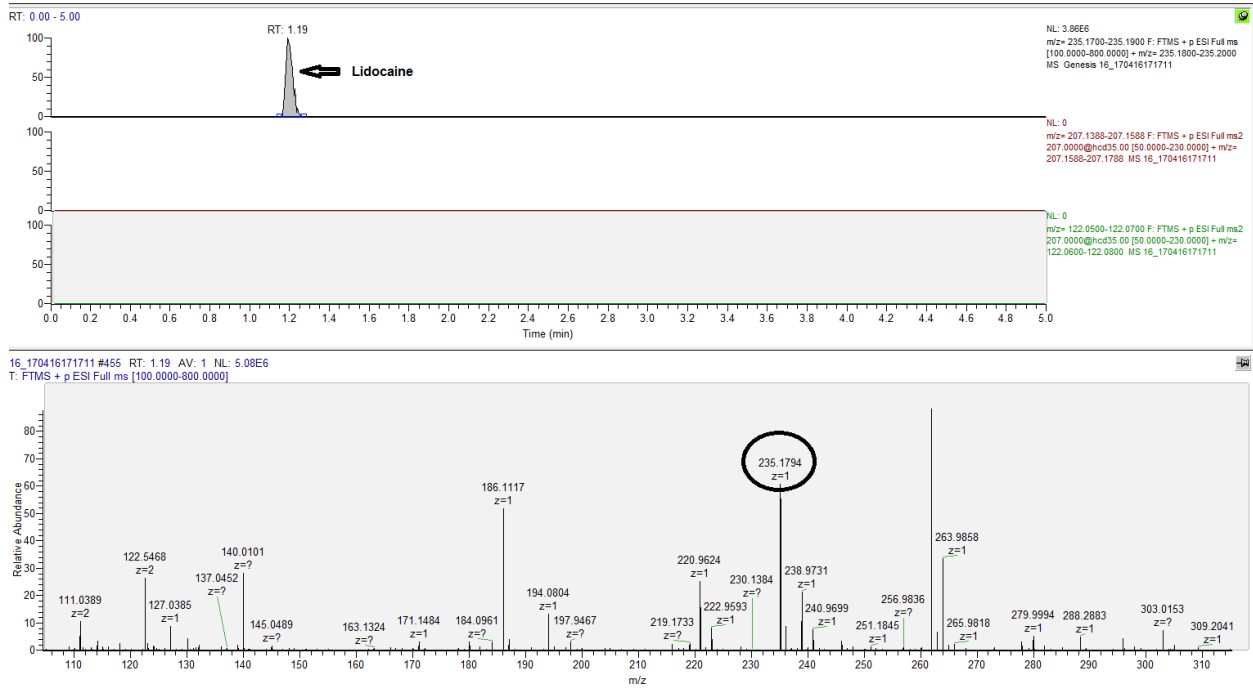

**Supplementary Figure 2. Calibration curves of (a) articaine and (b) lignocaine constructed by spiking different concentrations of articaine and lignocaine, respectively, in drug-free velvet antlers.**

**a**

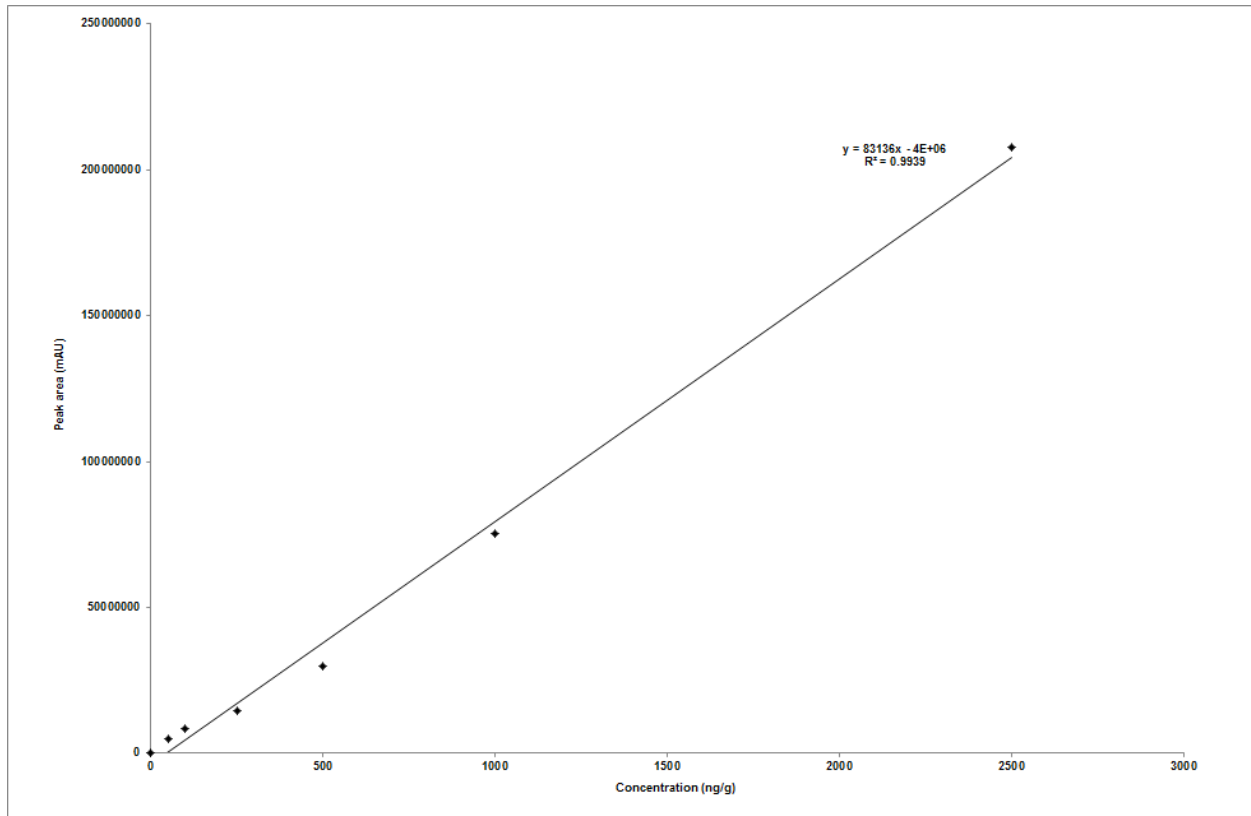

**b**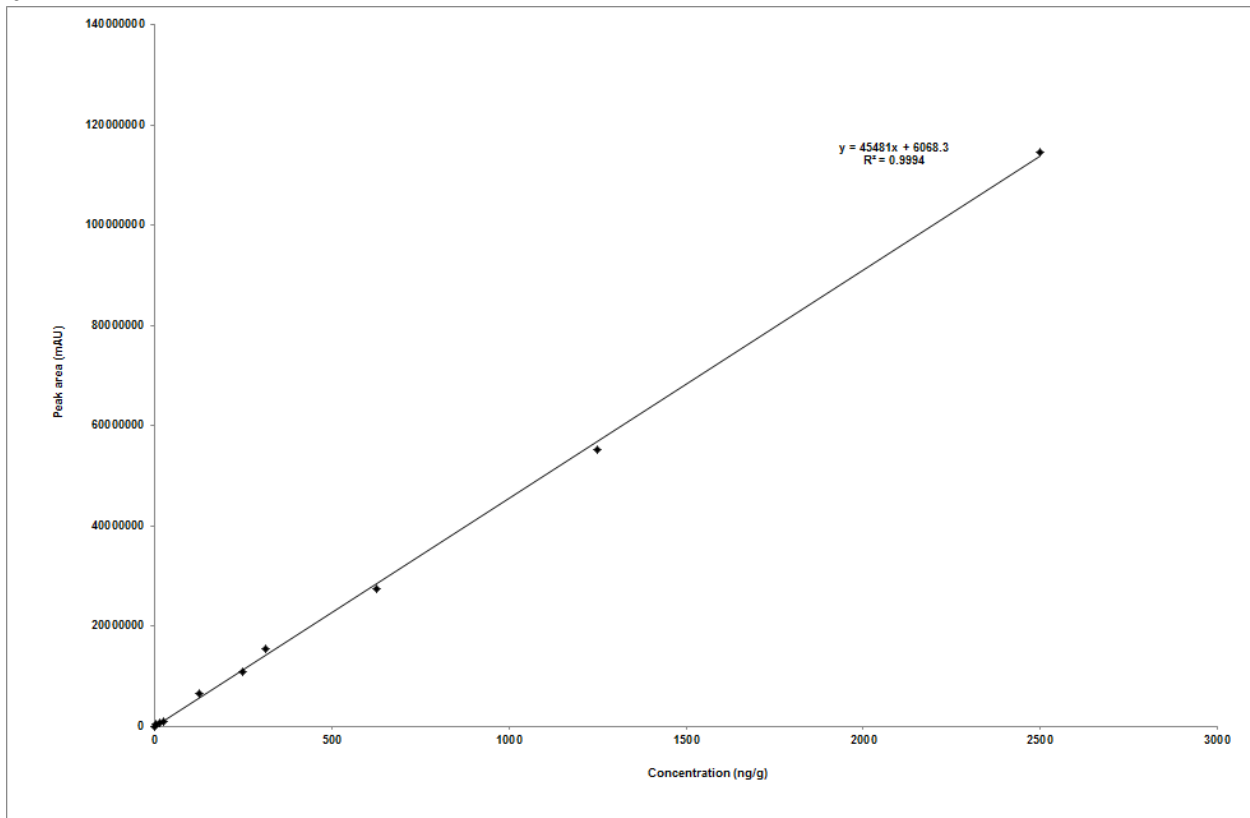

Supplement: Supplementary file 1 [file 15013826]
